# Supplementary material for: Muscle membrane potential and insect chill coma
Source: Oxford University Press journal article supplement (doi:10.1242/jeb.123760), 2015-01-01
Supplement: jeb123760supp.pdf [file jeb123760supp.pdf]

**Table S1. Details of the five *Drosophila* species used for experiments.** All species were kept in a  $20\pm 1^\circ\text{C}$  room for at least a year before experiments. Table contains; Species name (abbreviation), country of origin, year of collection, species distribution profile, critical thermal minimum ( $\text{CT}_{\text{min}}$ , means  $\pm$  s.e.m.), the chill coma recovery time (CCRT, means  $\pm$  s.e.m.) along with the source where the flies have been kept since collection, before being brought to our lab (see methods).

| Species (abbreviation)       | Origin    | Collection year | Distribution profile | $\text{CT}_{\text{min}}$ ( $^\circ\text{C}$ ) | CRRT (min)     | Source laboratory |
|------------------------------|-----------|-----------------|----------------------|-----------------------------------------------|----------------|-------------------|
| <i>D. birchii</i> (bir)      | Australia | 2008            | Tropical             | $8.79 \pm 0.19$                               | $62.5 \pm 4.6$ | Hoffmann, AU      |
| <i>D. equinoxialis</i> (equ) | Honduras  | <1984           | Tropical             | $7.25 \pm 0.13$                               | $42.3 \pm 2.0$ | DSSC, US          |
| <i>D. melanogaster</i> (mel) | Denmark   | 2011            | Widespread           | $3.46 \pm 0.07$                               | $15.7 \pm 0.9$ | Loeschcke, DK     |
| <i>D. persimilis</i> (per)   | Canada    | Unknown         | Temperate            | $0.38 \pm 0.14$                               | $1.1 \pm 0.2$  | DSSC, US          |
| <i>D. montana</i> (mon)      | Finland   | 2008            | Temperate            | $-1.99 \pm 0.05$                              | $1.8 \pm 0.4$  | Hoikkala, FI      |

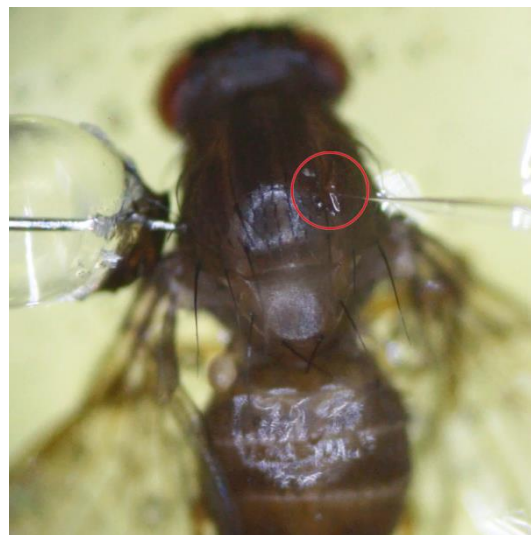

**Fig. S1. Photo showing the placement of the electrodes.** The reference electrode were inserted directly through the carapace (left) and glass electrode inserted into a flight muscle through a small window in the carapace cut with the tip of a syringe-needle (circled).
